# Supplementary material for: A colorimetric sensing platform for α-glucosidase activity monitoring and inhibitor screening via in situ reduction of 2,6-dichlorophenolindophenol
Source: Royal Society of Chemistry journal article supplement (doi:10.1039/d5nj02392k), 2025-01-01
Supplement: d5nj02392k1.pdf [file d5nj02392k1.pdf]

## Supporting Information

### **A Colorimetric Sensing Platform for $\alpha$ -Glucosidase Activity Monitoring and Inhibitor Screening via in Situ Reduction of 2, 6-Dichlorophenolindophenol**

Qian Liu, Yawen Luo, Xinyi Tao, Qunlin Zhang\*, Haifeng Lu\*

School of Pharmacy Science, Inflammation and Immune Mediated Diseases Laboratory of Anhui Province, Anhui Medical University, Hefei 230032, China.

\*Corresponding author,

E-mail: hflu@ahmu.edu.cn (H. Lu), qlzhang@ahmu.edu.cn (Q. Zhang).

## Supplementary Figures

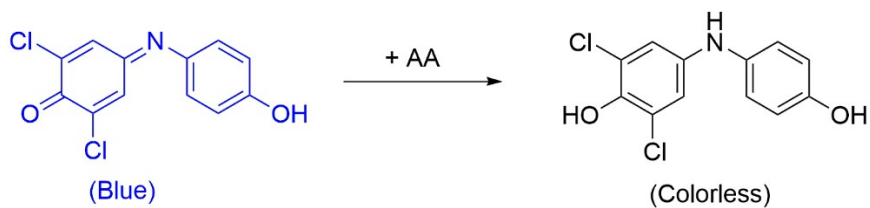

**Fig. S1.** Structural information of DCIP before and after reacting with generated AA.

| Colorimetry                       | a | b | c | d |
|-----------------------------------|---|---|---|---|
| AA 2G (0.65 mg mL <sup>-1</sup> ) | ✓ |   | ✓ |   |
| α-Glu (70 U L <sup>-1</sup> )     |   | ✓ | ✓ |   |
| DCIP (1.5 mg mL <sup>-1</sup> )   | ✓ | ✓ | ✓ | ✓ |
| AA (0.2 mg mL <sup>-1</sup> )     |   |   |   | ✓ |

**Fig. S2.** Experimental design using four combinations.

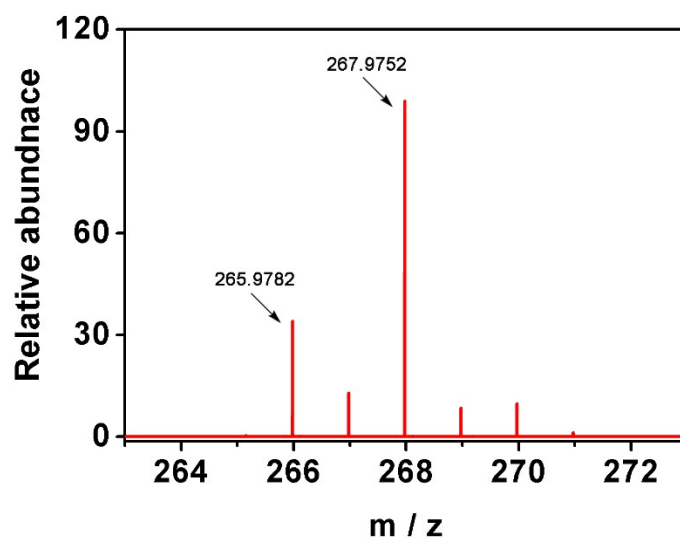

**Fig. S3.** Mass spectrometry of the DCIP/AA sensing system.

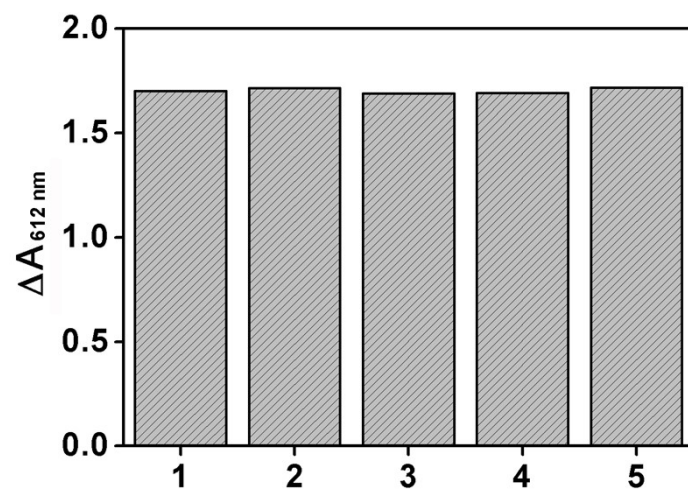

**Fig. S4.** Five repeated measurements of the sensing system after adding the  $\alpha$ -Glu activity (50 U L<sup>-1</sup>).

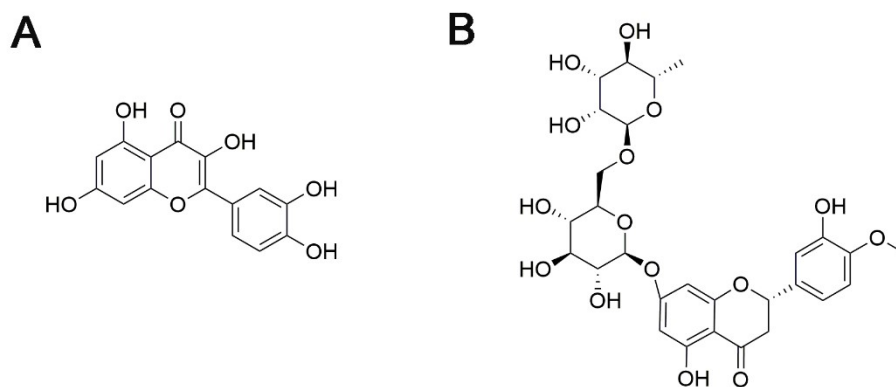

**Fig. S5.** The structural information of (A) quercetin and (B) hesperidin.
